# Supplementary material
Source: Springer Nature journal article supplement (https://www.springermedizin.de/resource/supplementary/12985_2010_1078_MOESM1_ESM.pdf/9609100)

**1**      **2**      **3**      **4**      **5**

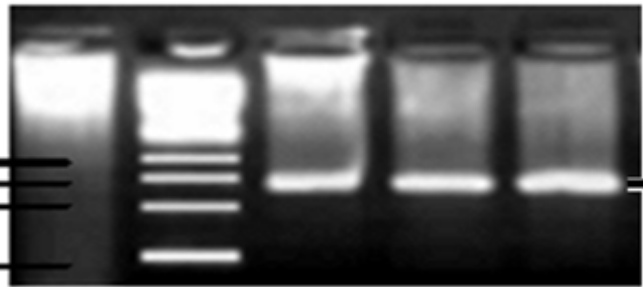

400 bp  
300 bp  
200 bp  
100 bp

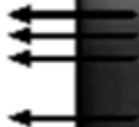

**285 bp**

Supplement: MOESM1 [file 9609100]
